# Supplementary material for: UV-crosslinked poly(arylene ether sulfone) – LAPONITE® nanocomposites for proton exchange membranes
Source: Royal Society of Chemistry journal article supplement (doi:10.1039/c7ra04419d), 2017-01-01
Supplement: c7ra04419d1.pdf [file c7ra04419d1.pdf]

## Electronic Supplementary Information

### UV-crosslinked Poly (arylene ether sulfone)-Laponite Nanocomposites for Proton Exchange Membranes

Sun Hwa Lee,<sup>a,‡</sup> Won Jun Lee,<sup>a,b,‡</sup> Tae Kyoung Kim,<sup>c,d</sup> Mustafa K. Bayazit,<sup>b</sup> Sang Ouk Kim,<sup>a</sup> and Yeong Suk Choi<sup>e,\*</sup>

<sup>a</sup>. Department of Materials Science and Engineering, KAIST, 291 Daehak-ro, Yuseong-gu, Daejeon 34141, Republic of Korea.

<sup>b</sup>. Department of Chemistry, Imperial College London, London, SW7 2AZ, United Kingdom.

<sup>c</sup>. Research Institute of Chemical and Electronic Materials, Samsung Cheil Industries Inc., Uiwang-si, 437-711, Republic of Korea.

<sup>d</sup>. A123 Systems, 200 West St. Waltham, MA 02451, United States.

<sup>e</sup>. Organic Materials Lab, Samsung Advanced Institute of Technology, 130, Samsung-ro, Yeongtong-gu, Suwon-si, Gyeonggi-do, 16678, Republic of Korea

<sup>‡</sup>These authors contributed equally to this work.

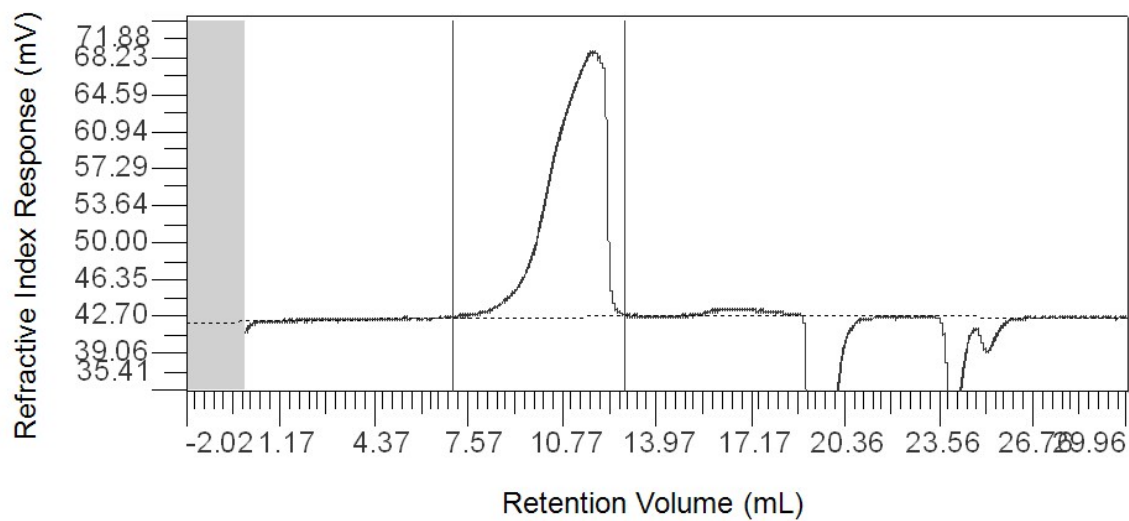

Fig. S1. Gel Permeation Chromatography (GPC) trace of as-synthesized sPAS. The Na-sDCDPS content in dihalides was 30 mol%. Number-Average Molecular Weight ( $M_n$ ) and Weight-Average Molecular Weight ( $M_w$ ) were 809,000 g/mol and 1,273,000 g/mol, respectively.

**Table. S1** Swelling behaviors of sPAs in MeOH. Membranes were immersed in 3M MeOH aqueous solution for 48 hours.

| Na-sDCDPS /<br>DABPA<br>HDDA <sup>a</sup> | Dried samples                  |                         |                         | Degree of Swelling (%) |       |       |       |        |
|-------------------------------------------|--------------------------------|-------------------------|-------------------------|------------------------|-------|-------|-------|--------|
|                                           | Thickness<br>( $\mu\text{m}$ ) | TD<br>(cm) <sup>b</sup> | MD<br>(cm) <sup>c</sup> | Thickness              | TD    | MD    | Area  | Volume |
| 30 / 25 / 0                               | 28                             | 1.2                     | 1.55                    | 111 %                  | 107 % | 106 % | 114 % | 126 %  |
| 30 / 25 / 5                               | 28                             | 1.2                     | 2                       | 104 %                  | 108 % | 106 % | 115 % | 119 %  |
| 30 / 25 / 10                              | 40                             | 1.24                    | 1.9                     | 105 %                  | 103 % | 106 % | 109 % | 115 %  |
| 30 / 25 / 15                              | 15                             | 1.2                     | 1.9                     | 107 %                  | 113 % | 105 % | 118 % | 126 %  |
| 20 / 25 / 0                               | 60                             | 1.5                     | 2                       | 102 %                  | 101 % | 104 % | 106 % | 108 %  |
| 20 / 25 / 10                              | 104                            | 1.5                     | 2                       | 101 %                  | 105 % | 104 % | 109 % | 110 %  |
| 20 / 25 / 15                              | 64                             | 1.5                     | 2                       | 102 %                  | 103 % | 104 % | 107 % | 108 %  |
| 20 / 25 / 25                              | 71                             | 1.5                     | 2                       | 104 %                  | 104 % | 105 % | 110 % | 114 %  |
| Nafion 115                                | 123                            | 1.5                     | 2                       | 120 %                  | 117 % | 121%  | 141 % | 169 %  |

<sup>a</sup>Na-sDCDPS / DABPA / HDDA mean the molar ratio (%) of specific reactants to total dihalides/diols/diallyl groups of loaded reactants. <sup>b</sup>TD denotes trajectory direction. <sup>c</sup>MD is machine direction.
